# Supplementary material for: Growth of membranes formed by associating polymers at interfaces
Source: Royal Society of Chemistry journal article supplement (doi:10.1039/d4sm00563e), 2024-01-01
Supplement: d4sm00563e1.pdf [file d4sm00563e1.pdf]

## Supplementary information

### **Growth of membranes formed by associating polymers at interfaces**

Elena N. Govorun,<sup>\*a</sup> Julien Dupré de Baubigny,<sup>b</sup> Patrick Perrin,<sup>b</sup> Mathilde Reyssat,<sup>a</sup> Nadège Pantoustier,<sup>b</sup> Thomas Salez<sup>c</sup> and Cécile Monteux<sup>\*b</sup>

<sup>a</sup>*UMR CNRS 7083 Gulliver, ESPCI Paris, PSL Research University, 75005 Paris, France*

<sup>b</sup>*Sciences et Ingénierie de La Matière Molle, UMR 7615, ESPCI Paris, PSL Research University, CNRS, Sorbonne Universités, 75005 Paris, France*

<sup>c</sup>*Université Bordeaux, CNRS, LOMA, UMR 5798, 33405 Talence, France*

## Data on titration of poly(methacrylic acid) (PMAA) solution with NaOH solution

The dependence of the PMAA ionization degree  $\alpha$  on pH (Fig. 6) was determined by using the potentiometric titration data as

$$\alpha = \frac{c_{\text{NaOH}} + c_{\text{H}^+}}{c_{\text{MAA}}},$$

where  $c_{\text{NaOH}}$  and  $c_{\text{H}^+}$  are the molarities of added NaOH and free hydrogen ions, respectively, and  $c_{\text{MAA}}$  is the molarity of monomer units.

For an initial PMAA solution in water with 1 wt % polymer concentration, the molarity is  $c_{\text{MAA}(0)} = 0.01 \rho_w / \mu_{\text{MMA}} \approx 0.116 \text{ mol/L}$  ( $N_A$  is the Avogadro number,  $\rho_w$  is the water density,  $\mu_{\text{MMA}} = 86 \text{ g/mol}$  is the molar mass of monomer unit). The molarity of the NaOH solution is  $c_{\text{NaOH}(0)} = 0.192 \text{ mol/L}$ . The volume of NaOH solution added is  $V_{\text{add}}$ . The molarity of  $\text{H}^+$  ions in the polymer solution is calculated as  $c_{\text{H}^+} = 10^{-\text{pH}}$ . The total volume of the polymer solution  $V_{\text{tot}} = V_0 + V_{\text{add}}$ , where  $V_0 = 9.3 \text{ ml}$  is the initial volume. The molarity of NaOH ions in the polymer solution is calculated as  $c_{\text{NaOH}} = c_{\text{NaOH}(0)} V_{\text{add}} / V_{\text{tot}}$ . The polymer molarity is calculated as  $c_{\text{MAA}} = c_{\text{MAA}(0)} V_0 / V_{\text{tot}}$ .

| $V_{\text{add}}$ , ml | pH   | $c_{\text{H}^+}$ , mol/L | $V_{\text{tot}}$ , ml | $c_{\text{NaOH}}$ , mol/L | $c_{\text{MAA}}$ , mol/L | $\alpha$ |
|-----------------------|------|--------------------------|-----------------------|---------------------------|--------------------------|----------|
| 0                     | 2,86 | 0,00138                  | 9,3                   | 0                         | 0,1163                   | 0,0119   |
| 0,105                 | 3,29 | 0,000513                 | 9,405                 | 0,0021                    | 0,1150                   | 0,0231   |
| 0,205                 | 3,8  | 0,000158                 | 9,505                 | 0,0041                    | 0,1138                   | 0,0378   |
| 0,305                 | 4,22 | 6,03E-05                 | 9,605                 | 0,0061                    | 0,1126                   | 0,0547   |
| 0,355                 | 4,3  | 5,01E-05                 | 9,655                 | 0,0071                    | 0,1120                   | 0,0635   |
| 0,405                 | 4,45 | 3,55E-05                 | 9,705                 | 0,0080                    | 0,1114                   | 0,0722   |
| 0,455                 | 4,64 | 2,29E-05                 | 9,755                 | 0,0090                    | 0,1109                   | 0,0810   |
| 0,505                 | 4,76 | 1,74E-05                 | 9,805                 | 0,0099                    | 0,1103                   | 0,0898   |
| 0,555                 | 4,9  | 1,26E-05                 | 9,855                 | 0,0108                    | 0,1097                   | 0,0986   |
| 0,605                 | 5,05 | 8,91E-06                 | 9,905                 | 0,0117                    | 0,1092                   | 0,1075   |
| 0,655                 | 5,08 | 8,32E-06                 | 9,955                 | 0,0126                    | 0,1086                   | 0,1163   |
| 0,755                 | 5,23 | 5,89E-06                 | 10,055                | 0,0144                    | 0,1075                   | 0,1341   |
| 0,805                 | 5,25 | 5,62E-06                 | 10,105                | 0,0153                    | 0,1070                   | 0,1429   |
| 0,855                 | 5,29 | 5,13E-06                 | 10,155                | 0,0162                    | 0,1065                   | 0,1518   |
| 1,005                 | 5,41 | 3,89E-06                 | 10,305                | 0,0187                    | 0,1049                   | 0,1784   |
| 1,105                 | 5,42 | 3,8E-06                  | 10,405                | 0,0204                    | 0,1039                   | 0,1962   |
| 1,205                 | 5,52 | 3,02E-06                 | 10,505                | 0,0220                    | 0,1029                   | 0,2139   |
| 1,305                 | 5,57 | 2,69E-06                 | 10,605                | 0,0236                    | 0,1020                   | 0,2316   |
| 1,505                 | 5,7  | 2E-06                    | 10,805                | 0,0267                    | 0,1001                   | 0,2671   |
| 1,705                 | 5,7  | 2E-06                    | 11,005                | 0,0297                    | 0,0983                   | 0,3026   |
| 2,205                 | 6,1  | 7,94E-07                 | 11,505                | 0,0368                    | 0,0940                   | 0,3914   |

|       |      |          |        |        |        |        |
|-------|------|----------|--------|--------|--------|--------|
| 2,705 | 6,45 | 3,55E-07 | 12,005 | 0,0432 | 0,0901 | 0,4801 |
| 3,205 | 6,8  | 1,58E-07 | 12,505 | 0,0492 | 0,0865 | 0,5688 |
| 3,705 | 7,4  | 3,98E-08 | 13,005 | 0,0547 | 0,0832 | 0,6576 |

## Experimental data on membrane growth for different pH

These data were obtained by *in situ* thickness measurements with a reflected light microscope mounted with an optical spectrometer (specim V8 connected to a camera). We focus white light on the oil-water interface. The spectrometer provides the reflected intensity as a function of wave length from which we deduce the membrane thickness (Fig. 7). The index of refraction 1.4 is used in the calculations.

pH=3

| <i>t</i> , min | <i>h</i> , μm | error, μm |
|----------------|---------------|-----------|
| 70             | 0,36          | 0,05      |
| 90             | 0,4           | 0,05      |
| 120            | 0,47          | 0,05      |
| 190            | 0,54          | 0,05      |
| 270            | 0,645         | 0,1       |
| 530            | 0,87          | 0,1       |
| 860            | 1,1           | 0,1       |
| 1130           | 1,27          | 0,1       |
| 1200           | 1,3           | 0,1       |
| 1330           | 1,375         | 0,1       |
| 1530           | 1,47          | 0,1       |
| 1730           | 1,56          | 0,1       |
| 1930           | 1,63          | 0,1       |
| 2130           | 1,705         | 0,1       |
| 2330           | 1,78          | 0,1       |

pH=4.5

| $t$ , min | $h$ , $\mu\text{m}$ | error, $\mu\text{m}$ |
|-----------|---------------------|----------------------|
| 50        | 0,26                | 0,02                 |
| 100       | 0,385               | 0,02                 |
| 200       | 0,48                | 0,025                |
| 250       | 0,545               | 0,05                 |
| 350       | 0,61                | 0,05                 |
| 480       | 0,74                | 0,05                 |
| 680       | 0,86                | 0,05                 |
| 810       | 0,96                | 0,05                 |
| 1060      | 1,09                | 0,1                  |
| 1500      | 1,3                 | 0,1                  |
| 2100      | 1,53                | 0,1                  |
| 2800      | 1,74                | 0,1                  |
| 3700      | 1,955               | 0,1                  |
| 4300      | 2,09                | 0,2                  |
| 5200      | 2,24                | 0,2                  |
| 5900      | 2,34                | 0,2                  |
| 6500      | 2,435               | 0,2                  |
| 7400      | 2,55                | 0,2                  |

pH=4.9

| $t$ , min | $h$ , $\mu\text{m}$ | error, $\mu\text{m}$ |
|-----------|---------------------|----------------------|
| 150       | 0,21                | 0,02                 |
| 440       | 0,29                | 0,02                 |
| 600       | 0,38                | 0,025                |
| 880       | 0,4                 | 0,05                 |
| 1340      | 0,49                | 0,05                 |
| 2040      | 0,58                | 0,05                 |
| 4440      | 0,77                | 0,05                 |
| 5740      | 0,81                | 0,05                 |
| 9640      | 0,9                 | 0,1                  |
| 11940     | 0,95                | 0,1                  |
| 13840     | 0,98                | 0,1                  |
| 15540     | 1                   | 0,1                  |
| 18240     | 1,05                | 0,1                  |

pH=5

| $t$ , min | $h$ , $\mu\text{m}$ | error, $\mu\text{m}$ |
|-----------|---------------------|----------------------|
| 150       | 0,21                | 0,02                 |
| 440       | 0,29                | 0,02                 |
| 600       | 0,38                | 0,025                |
| 880       | 0,4                 | 0,05                 |
| 1340      | 0,49                | 0,05                 |
| 2040      | 0,58                | 0,05                 |
| 4440      | 0,77                | 0,05                 |
| 5740      | 0,81                | 0,05                 |
| 9640      | 0,9                 | 0,1                  |
| 11940     | 0,95                | 0,1                  |
| 13840     | 0,98                | 0,1                  |
| 15540     | 1                   | 0,1                  |
| 18240     | 1,05                | 0,1                  |

pH=5.1

| $t$ , min | $h$ , $\mu\text{m}$ | error, $\mu\text{m}$ |
|-----------|---------------------|----------------------|
| 2400      | 0,39                | 0,025                |
| 4500      | 0,48                | 0,05                 |
| 6200      | 0,54                | 0,05                 |
| 10000     | 0,58                | 0,05                 |
